# Complete Genome Sequence of a Pantón-Valentine Leukocidin-Negative Community-Associated Methicillin-Resistant *Staphylococcus aureus* Strain of Sequence type 72 from Korea

Yan Chen<sup>1,2</sup>, Som S. Chatterjee<sup>1</sup>, Stephen F. Porcella<sup>3</sup>, Yun-Song Yu<sup>2</sup>, Michael Otto<sup>1\*</sup>

**1** Pathogen Molecular Genetics Section, Laboratory of Human Bacterial Pathogenesis, National Institute of Allergy and Infectious Diseases, U.S. National Institutes of Health, Bethesda, Maryland, United States of America, **2** Department of Infectious Diseases, Sir Run Run Shaw Hospital, College of Medicine, Zhejiang University, Hangzhou, China, **3** Genomics Unit, Research Technologies Branch, National Institute of Allergy and Infectious Diseases, U.S. National Institutes of Health, Hamilton, Montana, United States of America

## Abstract

In the past decade, community-associated (CA-) infections with methicillin-resistant *Staphylococcus aureus* (MRSA) have emerged throughout the world. Different CA-MRSA strains dominate in different geographical locations. Many CA-MRSA lineages contain genes coding for the Pantón-Valentine leukocidin. However, the role of this leukotoxin in CA-MRSA pathogenesis is still controversial. The genome sequences of two key PVL-positive CA-MRSA strains (USA300, USA400) have been reported, but we lack information on the more recently found PVL-negative CA-MRSA strains. One such strain is the PVL-negative ST72, the main cause of CA-MRSA infections in Korea. Here, we report the entire genome sequence of CA-MRSA ST72 and analyze its gene content with a focus on virulence factors. Our results show that this strain does not have considerable differences in virulence factor content compared to other CA-MRSA strains (USA300, USA400), indicating that other toxins do not substitute for the lack of PVL in ST72. This finding is in accordance with the notion that differential expression of widespread virulence determinants, rather than the acquisition of additional virulence factors on mobile genetic elements, such as PVL, is responsible for the increased virulence of CA- compared to hospital-associated MRSA.

**Citation:** Chen Y, Chatterjee SS, Porcella SF, Yu Y-S, Otto M (2013) Complete Genome Sequence of a Pantón-Valentine Leukocidin-Negative Community-Associated Methicillin-Resistant *Staphylococcus aureus* Strain of Sequence type 72 from Korea. PLoS ONE 8(8): e72803. doi:10.1371/journal.pone.0072803

**Editor:** Min Li, Huashan Hospital, Shanghai Medical College, Fudan University, China

**Received:** June 11, 2013; **Accepted:** July 13, 2013; **Published:** August 20, 2013

This is an open-access article, free of all copyright, and may be freely reproduced, distributed, transmitted, modified, built upon, or otherwise used by anyone for any lawful purpose. The work is made available under the Creative Commons CC0 public domain dedication.

**Funding:** Funding sources: Intramural Program of the NIAID (ZIA AI000904-12); Ministry of Health of the People's Republic of China (no. 201002021). The funders had no role in study design, data collection and analysis, decision to publish, or preparation of the manuscript.

**Competing interests:** Michael Otto is an Academic Editor for PLOS ONE. This does not alter the authors' adherence to all the PLOS ONE policies on sharing data and materials.

\* E-mail: motto@niaid.nih.gov

## Introduction

*Staphylococcus aureus* is a dangerous human pathogen and *S. aureus* infections are among the most frequent causes of deaths in hospitals around the globe [1]. Antibiotic resistance severely complicates the treatment of such infections [2]. After the worldwide spread of penicillin-resistant strains in the mid of the last century, methicillin became the treatment option of choice for *S. aureus* infections. However, methicillin resistance developed quickly, and nowadays methicillin-resistant *S. aureus* (MRSA) is pandemic, with many countries reporting methicillin resistance rates among hospital-associated *S. aureus* isolates that exceed 50% [3].

In the 1990s, MRSA infections – previously limited to predisposed patients in hospitals – started occurring in

otherwise healthy people in the community without connections to the hospital setting [4]. These community-associated (CA-) MRSA infections are on a worldwide surge, with the United States so far seeing the most pronounced CA-MRSA epidemic. Most CA-MRSA infections are moderately severe infections of the skin and soft tissues, but more severe and sometimes fatal infections, such as necrotizing pneumonia, are also seen with CA-MRSA. The rise of CA-MRSA is due to the development of strains that combine methicillin resistance with a high level of aggressive virulence not commonly present in hospital-associated (HA-) MRSA [5]. Globally, CA-MRSA infections are caused by different lineages that are not genetically related [6]. In addition to pronounced virulence, which they all share, some strains may express specific additional factors that further promote pathogenic success. For example, the epidemic U.S.

**Table 1.** Genomic and pathogenicity islands.

|              | HL1 (ST72) | MW2 (USA400) | FPR3757 (USA300) |
|--------------|------------|--------------|------------------|
| vSa1         | -          | -            | -                |
| vSa2         | -          | -            | -                |
| vSa3         | -          | +            | +                |
| vSa4         | -          | +            | -                |
| vSa $\alpha$ | +          | +            | +                |
| vSa $\beta$  | +          | +            | +                |
| vSa $\gamma$ | +          | +            | +                |
| $\Phi$ Sa1   | -          | -            | -                |
| $\Phi$ Sa2   | -          | +            | +                |
| $\Phi$ Sa3   | +          | +            | +                |

strain, USA300, harbors a mobile genetic element (MGE), called arginine catabolic element (ACME), containing a gene, *speG*, which abrogates the unique hypersensitivity of *S. aureus* to host-produced polyamines, thereby increasing survival on the human skin and during skin abscesses [7].

Soon after the first cases of CA-MRSA infections, researchers started determining the genetic composition of CA-MRSA isolates, including by whole-genome sequencing [8,9]. The most important initial finding was that genes encoding a specific leukotoxin, the Pantón-Valentine leukocidin (PVL), were present in virtually all CA-MRSA isolates, while these genes, called *lukS* and *lukF*, are much less frequent among HA-MRSA [10]. However, further investigation using animal infection models indicated that the extraordinary virulence of CA-MRSA is only in part, and in comparatively rare types of infections such as severe lung infection, due to PVL [5,11,12]. Rather, high expression of core genome-encoded virulence determinants, such as phenol-soluble modulins (PSMs) and  $\alpha$ -toxin, appears to have played a preeminent role in the evolution of CA-MRSA virulence, especially as it relates to skin infections [12–14].

In addition to animal experiments casting doubt on the key role of PVL and the acquisition of the prophage  $\Phi$ SLT containing the *lukSF* genes during the evolution of CA-MRSA virulence, several CA-MRSA strains have been isolated in the meantime that do not harbor *lukSF* and therefore do not produce PVL [5]. One such strain is the CA-MRSA clone of sequence type (ST) 72 that is the premier cause of CA-MRSA infections in Korea [15]. Here, to gain insight in the genetic composition as a basis for the extraordinary, PVL-independent virulence of that strain, we determined the whole genome sequence of a CA-MRSA ST72 isolate and analyzed its composition with a focus on virulence factors.

## Materials and Methods

### DNA extraction

Total bacterial DNA was isolated from an overnight culture of HL1 (ST72) using lysostaphin digestion and the method of Marmur [16]. The pellet of a 1-ml overnight culture was resuspended with 400  $\mu$ l buffer P1 (Qiagen), to which 20  $\mu$ l lysostaphin were added. The sample was incubated at 37°C for

15 min. Then 20  $\mu$ l of a saturated sodium dodecylsulfate solution (in 45% ethanol) was added, the sample was vortexed, and incubated at 37°C for 5 min. Then 130  $\mu$ l of a 5 M sodium perchlorate solution were added, and the sample was vortexed again. Six hundred  $\mu$ l of phenol/chloroform/isoamylalcohol (25:24:1 by volume) were added, the sample was vortexed, and the bottom phase transferred to a new tube. This extraction was repeated twice, then 800  $\mu$ l ice-cold ethanol was added to precipitate the DNA, which was harvested by centrifugation for 15 min at 13,000 rpm in a tabletop centrifuge. The DNA was washed twice with 70% ethanol and resuspended in water.

### Genome sequencing, annotation and comparative analysis

DNA sequencing was performed using fragment and paired-end libraries on a Roche 454 FLX genome sequencer using Titanium chemistry (454 Life Sciences [a Roche company], Branford, CT). Coverage of 40-60 $\times$  or higher was obtained according to the manufacturer's recommendations. Reads were assembled using the GS Assembler Version 2.5 software program. 454 reads were re-aligned to the contigs to check for assembly accuracy, and misassembled portions were corrected. All gaps between contigs were closed by oligonucleotide primer design, PCR fragment generation, and Sanger sequencing of the PCR products on an Applied Biosystems 3730XL DNA sequencer (Applied Biosystems, Foster City, CA). Primer walking of large gaps or correction of ambiguous base calls was performed by PCR and Sanger sequencing. Open reading frame (ORF) calling was performed using public and proprietary algorithms, with a minimum length cutoff of 40 amino acids, as previously described [17,18]. The genome sequence and annotation of HL1 (ST72) are deposited in DDBJ/EMBL/GenBank under the NCBI accession numbers CP003979 (chromosome), CP003980 (pHL1), CP003981 (pHL2). ORFs displaying evidence of frameshifts or mutations leading to premature stop codons were identified by proprietary algorithms and were manually verified. Genome comparisons were performed using ClustalW alignments.

### Genome analysis

To compare genome contents, we used a proprietary algorithm (Integrated Genomics) and compared every ORF from the HL1 genome with the ORFs from the two selected *S. aureus* genomes (FPR3757, MW2). Each ORF was compared using three metrics: similarity score (1e-10), functional annotation, and protein length. For ORFs to be considered for inclusion the following criteria had to be satisfied. The considered ORFs must have a P-Score similarity to an ORF from the HL1 genome of 1e-10 or less. In addition, the ORF in consideration should either have same functional annotation as of the HL1 genome's ORF or have at least 80% matching protein length with that of the corresponding ORF in the HL1 genome. Further genome analyses were performed using ERGO (Integrated Genomics).

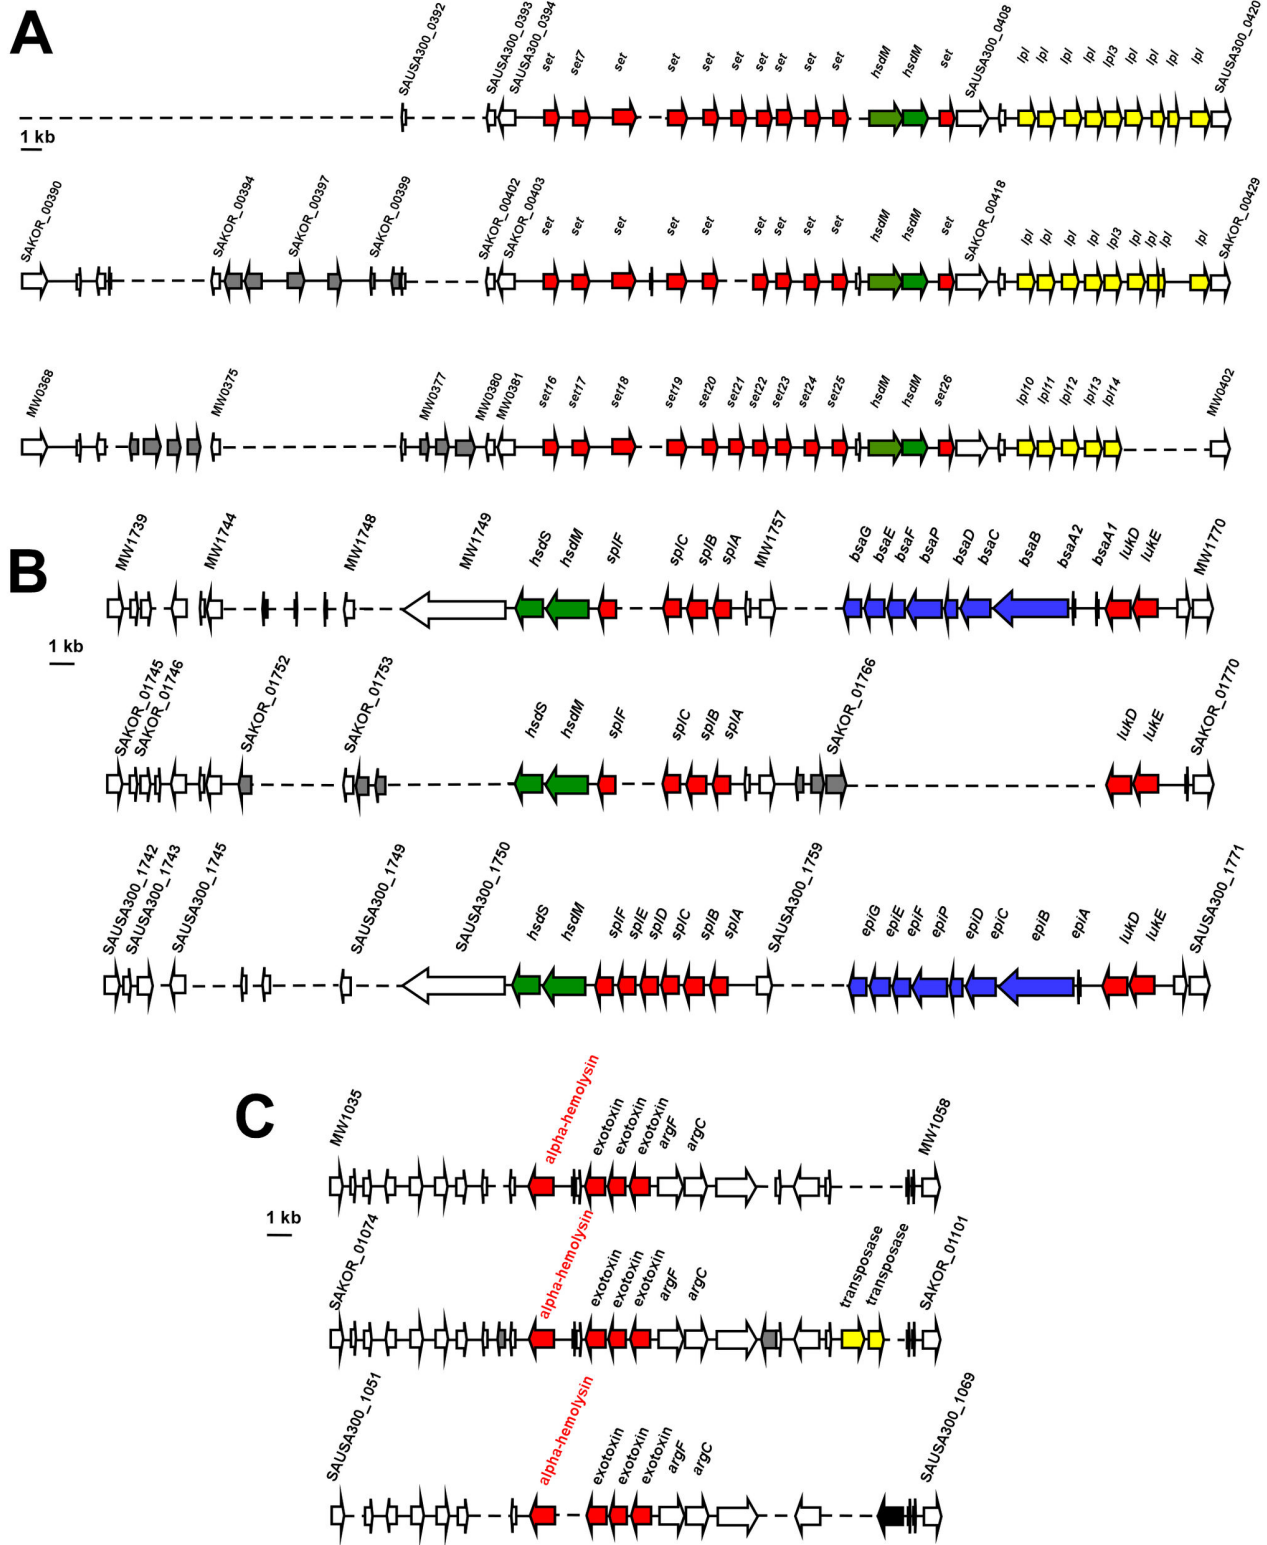

**Figure 1. Genomic islands in ST72 HL1 compared to USA300 and USA400.** A, vSac genomic island. B, vSaβ genomic island. C, vSay genomic island. Broken lines, missing ORFs; red, virulence determinants; green, type I restriction-modification system specificity subunit; yellow, lipoproteins; blue, bacteriocin-related genes; yellow, determinants; grey= ORF not identical to other strains.

doi: 10.1371/journal.pone.0072803.g001

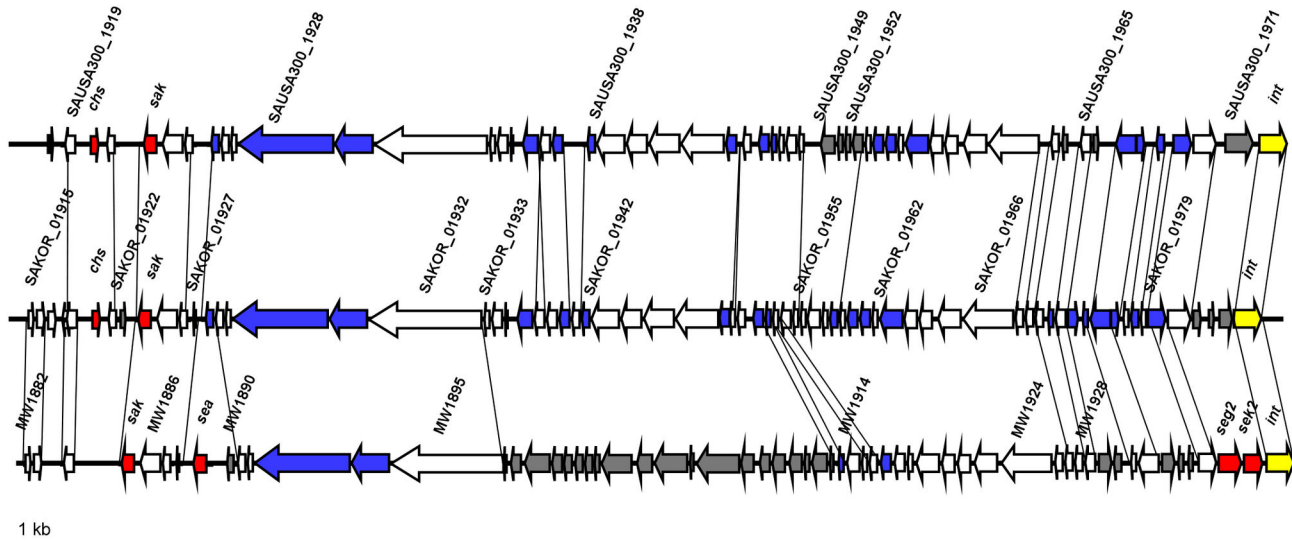

**Figure 2.  $\Phi$ Sa3 prophage in ST72 HL1 compared to USA300 and USA400.** Broken lines, missing ORFs; red, virulence determinants; blue, phage gene or phage-related gene; grey, ORF not identical to other strains.

doi: 10.1371/journal.pone.0072803.g002

## Results and Discussion

### Overview

The CA-MRSA isolate HL1, previously also termed CN1 [13], was obtained from the pus of a necrotizing fasciitis infection in an 80-year old patient in the Seoul area of South Korea [15]. The isolate was then determined to be PVL-negative, resistant to clindamycin and erythromycin, belong to ST72 and spa type t324, and harbor SCCmec type IVa. Furthermore, we previously showed that it has high virulence in a rabbit model of skin infection and promotes neutrophil lysis to an extent almost as pronounced as seen with strain USA300 and within the range of other global CA-MRSA isolates [13].

The isolate has a genome of 2,757,070 base pairs (bp), with 2,726 assigned ORFs, of which 1970 have assigned functions, 53 tRNAs, and 9 rRNAs. The overall GC content is 32.79%. The HL1 genome is thus a little shorter than those of the prominent CA-MRSA strains USA300 (strain FPR3757, 2,917,469 bp, 2672 ORFs) and USA400 (strain MW2, 2,820,462 bp, 2644 ORFs) [4,8], which will serve as comparison in this study. HL1 also harbors two plasmids, which we named pHL1 and pHL2, of 3332 and 2472 bp, respectively.

### Virulence factors and pathogenicity islands

HL1 harbors the vSa $\alpha$ , vSa $\beta$ , and vSa $\gamma$  genomic islands and the  $\Phi$ Sa3 prophage (Tab. 1). The vSa $\alpha$ , vSa $\beta$ , and vSa $\gamma$  genomic islands occur in most *S. aureus* strains and harbor a series of virulence factors. For example, vSa $\alpha$  encodes a series of exotoxins and a restriction/modification system. vSa $\beta$  encodes another restriction/modification system, four serine proteases, and the bicomponent leukocidin LukDE. vSa $\gamma$  encodes exotoxins, fibrinogen-binding proteins, a formyl peptide receptor 1 inhibitory protein,  $\alpha$ -toxin, and the phenol-

soluble modulins (PSMs) PSM $\beta$ 1 and PSM $\beta$ 2. The  $\Phi$ Sa3 prophage is not always present in *S. aureus*; for example, it is absent from the HA-MRSA strain COL, representing the archaic MRSA lineage. It contains genes encoding immune evasion factors, namely the chemotaxis inhibitory protein CHIPS, the complement inhibitor SCIN, and staphylokinase. Of note,  $\Phi$ Sa3 splits the gene encoding the sphingomyelinase  $\beta$ -toxin into two non-functional parts.

These islands and the  $\Phi$ Sa3 prophage are also present in the USA300 and USA400 CA-MRSA strains. Although the overall genetic composition differs, there are no considerable differences in known virulence determinants (Figs. 1, 2). As a notable exception, HL1 vSa $\beta$  does not contain the *bsa* operon coding for the biosynthesis of the epidermin-like lantibiotic aureodermin. It has been shown that this operon encodes a functional lantibiotic [19]. However, production levels are very low under all conditions tested so far, and the role of aureodermin in *S. aureus* physiology is unclear [20]. Importantly, HL1 does not contain virulence factors encoded on genomic islands or prophages that are absent from USA300 and USA400. Vice versa, both USA300 and USA400 contain the  $\Phi$ Sa2 ( $\Phi$ SLT) prophage harboring the *lukSF* genes coding for PVL. USA300 and USA400 also contain the vSa3, and USA400 the vSa4 pathogenicity islands, which are absent from HL1. vSa3 contains two enterotoxin genes with unknown function in virulence, and vSa4 does not comprise known virulence factors. Finally, USA300 contains ACME, harboring the recently described virulence and colonization factor *speG* [21].

A genome-wide analysis on 103 virulence genes to determine whether virulence factors present in HL1 are also present in USA300 and USA400 further confirmed that the overall composition of virulence genes in HL1, USA300, and USA400 is almost identical (Tab. 2). USA300 is missing two

**Table 2.** Presence/absence of important virulence factor genes found in HL1 in comparison to USA300 and USA400.

| Annotation                                               | Gene number | HL1            | USA 400 | USA 300 |
|----------------------------------------------------------|-------------|----------------|---------|---------|
| Immunoglobulin G binding protein A precursor             | SAKer_00085 | +              | +       | +       |
| Lipase (EC 3.1.1.3)                                      | SAKer_00314 | +              | +       | +       |
| Exotoxin                                                 | SAKer_00368 | +              | +       | +       |
| Exotoxin                                                 | SAKer_00404 | +              | +       | +       |
| Exotoxin                                                 | SAKer_00405 | +              | +       | +       |
| Exotoxin                                                 | SAKer_00406 | +              | +       | +       |
| Exotoxin                                                 | SAKer_00408 | +              | +       | +       |
| Exotoxin                                                 | SAKer_00409 | +              | +       | +       |
| Exotoxin                                                 | SAKer_00410 | +              | +       | +       |
| Exotoxin                                                 | SAKer_00411 | +              | +       | +       |
| Exotoxin                                                 | SAKer_00412 | +              | +       | +       |
| Exotoxin                                                 | SAKer_00413 | +              | +       | +       |
| Exotoxin                                                 | SAKer_00417 | +              | +       | +       |
| Phenol-soluble modulins $\alpha$ 4                       | SAKer_05000 | +              | +       | +       |
| Phenol-soluble modulins $\alpha$ 3                       | SAKer_05001 | +              | +       | +       |
| Phenol-soluble modulins $\alpha$ 2                       | SAKer_05002 | +              | +       | +       |
| Phenol-soluble modulins $\alpha$ 1                       | SAKer_05003 | +              | +       | +       |
| Staphylococcal accessory regulator SarA                  | SAKer_00611 | +              | +       | +       |
| Lipase (EC 3.1.1.3)                                      | SAKer_00649 | +              | +       | +       |
| Staphylococcal accessory regulator homolog (SarX)        | SAKer_00663 | +              | +       | +       |
| Sensory transduction protein kinase SaeS (EC 2.7.13.3)   | SAKer_00702 | +              | +       | +       |
| Two-component response regulator SaeR                    | SAKer_00703 | +              | +       | +       |
| Staphylocoagulase precursor                              | SAKer_00791 | × <sup>1</sup> | ×       | +       |
| Thermonuclease (EC 3.1.31.1)                             | SAKer_00795 | +              | +       | +       |
| Staphostatin B                                           | SAKer_00967 | +              | +       | +       |
| Staphopain (EC 3.4.22.48)                                | SAKer_00968 | +              | +       | +       |
| Glutamyl endopeptidase precursor (EC 3.4.21.19)          | SAKer_00969 | +              | +       | +       |
| Heme uptake protein IsdB                                 | SAKer_01050 | +              | +       | +       |
| Heme uptake heme-iron binding protein IsdA               | SAKer_01051 | +              | +       | +       |
| Heme uptake cell surface protein IsdC                    | SAKer_01052 | +              | +       | +       |
| Heme uptake ABC transporter, membrane component IsdD     | SAKer_01053 | +              | +       | +       |
| Heme uptake ABC transporter, heme-binding protein IsdE   | SAKer_01054 | +              | +       | +       |
| Heme uptake ABC transporter, permease protein IsdF       | SAKer_01055 | +              | +       | +       |
| Sortase B family protein                                 | SAKer_01056 | +              | +       | +       |
| Formyl peptide receptor family 1 inhibitory protein FlpI | SAKer_01077 | +              | +       | +       |
| Alpha-hemolysin                                          | SAKer_01084 | +              | +       | +       |
| Exotoxin                                                 | SAKer_01087 | +              | +       | +       |
| Exotoxin                                                 | SAKer_01088 | +              | +       | +       |
| Exotoxin                                                 | SAKer_01089 | +              | +       | +       |
| Phenol-soluble modulins $\beta$ 1                        | SAKer_01099 | +              | +       | +       |
| Phenol-soluble modulins $\beta$ 2                        | SAKer_01100 | +              | +       | +       |
| Peptide deformylase (EC 3.5.1.88)                        | SAKer_01142 | +              | +       | +       |

Table 2 (continued).

| Annotation                                                              | Gene number | HL1 | USA 400 | USA 300 |
|-------------------------------------------------------------------------|-------------|-----|---------|---------|
| Thermonuclease (EC 3.1.31.1)                                            | SAKer_01259 | +   | +       | +       |
| Lysyltransferase (EC 2.3.2.3) MprF                                      | SAKer_01297 | +   | +       | +       |
| Two-component sensor kinase ArlS (EC 2.7.13.3)                          | SAKer_01351 | +   | +       | +       |
| Two-component response regulator ArlR                                   | SAKer_01352 | +   | +       | +       |
| Superoxide dismutase (EC 1.15.1.1)                                      | SAKer_01500 | +   | +       | +       |
| Enterotoxin                                                             | SAKer_01549 | +   | +       | +       |
| Enterotoxin                                                             | SAKer_01550 | +   | +       | +       |
| Heme uptake receptor for hemoglobin-haptoglobin complexes IsdH          | SAKer_01672 | +   | +       | +       |
| Staphylococcal accessory regulator homolog (Rot)                        | SAKer_01705 | +   | +       | +       |
| Serine protease (EC 3.4.21. -) SplD                                     | SAKer_01758 | +   | +       | +       |
| Serine protease (EC 3.4.21. -) SplC                                     | SAKer_01759 | +   | +       | +       |
| Serine protease (EC 3.4.21. -) SplB                                     | SAKer_01760 | +   | +       | +       |
| Serine protease (EC 3.4.21. -) SplA                                     | SAKer_01761 | +   | +       | +       |
| Leukocidin F subunit (LukD)                                             | SAKer_01767 | +   | +       | +       |
| Leukocidin S subunit (LukE)                                             | SAKer_01768 | +   | +       | +       |
| Enterotoxin                                                             | SAKer_01776 | +   | +       | -       |
| Enterotoxin                                                             | SAKer_01777 | +   | +       | +       |
| Enterotoxin                                                             | SAKer_01778 | +   | +       | -       |
| Enterotoxin                                                             | SAKer_01779 | +   | +       | +       |
| Enterotoxin                                                             | SAKer_01780 | +   | +       | +       |
| Enterotoxin                                                             | SAKer_01781 | +   | +       | +       |
| Staphopain (EC 3.4.22.48)                                               | SAKer_01871 | +   | +       | +       |
| Phenol-soluble modulins export ABC transporter permease PmtD            | SAKer_01904 | +   | +       | +       |
| Phenol-soluble modulins export ABC transporter ATP-binding protein PmtC | SAKer_01905 | +   | +       | +       |
| Phenol-soluble modulins export ABC transporter permease PmtB            | SAKer_01906 | +   | +       | +       |
| Phenol-soluble modulins export ABC transporter ATP-binding protein PmtA | SAKer_01907 | +   | +       | +       |
| Phospholipase C (beta-hemolysin) (EC 3.1.4.3), truncated                | SAKer_01914 | x   | x       | x       |
| Staphylococcal complement inhibitor SCIN                                | SAKer_01918 | x   | +       | +       |
| Chemotaxis-inhibiting protein                                           | SAKer_01920 | +   | -       | +       |
| Staphylokinase precursor                                                | SAKer_01923 | +   | +       | +       |
| Leukocidin F subunit                                                    | SAKer_01986 | +   | +       | +       |
| Leukocidin S subunit                                                    | SAKer_01987 | +   | +       | +       |
| Delta-hemolysin                                                         | SAKer_01999 | +   | +       | +       |
| Accessory gene regulator protein B AgrB                                 | SAKer_02000 | +   | +       | +       |
| Autoinducing peptide precursor AgrD                                     | SAKer_02001 | +   | +       | +       |
| Sensory transduction histidine kinase AgrC (EC 2.7.3. -)                | SAKer_02002 | +   | +       | +       |
| Accessory gene regulator protein A AgrA                                 | SAKer_02003 | +   | +       | +       |
| RNA polymerase sigma-B factor                                           | SAKer_02029 | +   | +       | +       |
| Staphylococcal accessory regulator homolog (SarV)                       | SAKer_02230 | +   | +       | +       |
| Staphylococcal accessory regulator homolog (SarR)                       | SAKer_02260 | +   | +       | +       |
| Staphylococcal accessory regulator homolog (SarY)                       | SAKer_02262 | +   | +       | +       |
| Esterase (EC 3.1.1. -)                                                  | SAKer_02324 | +   | +       | +       |
| Gamma-hemolysin subunit A                                               | SAKer_02399 | +   | +       | +       |

Table 2 (continued).

| Annotation                                                                | Gene number | HL1 | USA 400 | USA 300 |
|---------------------------------------------------------------------------|-------------|-----|---------|---------|
| Gamma-hemolysin subunit C                                                 | SAKer_02401 | +   | +       | +       |
| Gamma-hemolysin subunit B                                                 | SAKer_02402 | +   | +       | +       |
| Staphylococcal accessory regulator homolog (SarT/SarH3)                   | SAKer_02485 | +   | +       | +       |
| Staphylococcal accessory regulator homolog (SarU/SarH2)                   | SAKer_02486 | +   | +       | +       |
| Sortase A                                                                 | SAKer_02517 | +   | +       | +       |
| Esterase (EC 3.1.1. -)                                                    | SAKer_02525 | +   | +       | +       |
| Staphyloxanthin biosynthesis protein CrtN (dehydrosqualene dehydrogenase) | SAKer_02552 | +   | +       | +       |
| Staphyloxanthin biosynthesis protein CrtM (dehydrosqualene synthase)      | SAKer_02554 | +   | +       | +       |
| Staphyloxanthin biosynthesis protein CrtQ                                 | SAKer_02555 | +   | +       | +       |
| Staphyloxanthin biosynthesis protein CrtP                                 | SAKer_02556 | +   | +       | +       |
| Staphyloxanthin biosynthesis protein CrtO                                 | SAKer_02557 | +   | +       | +       |
| Esterase/Lipase (EC 3.1. -. -)                                            | SAKer_02575 | +   | +       | +       |
| Zinc metalloproteinase aureolysin (EC 3.4.24.29)                          | SAKer_02638 | +   | +       | +       |
| N-acetylglucosaminyltransferase (EC 2.4.1. -) IcaA                        | SAKer_02668 | +   | +       | +       |
| N-acetylglucosaminyltransferase, accessory part IcaD                      | SAKer_02669 | +   | +       | +       |
| Polysaccharide intercellular adhesin deacetylase IcaB                     | SAKer_02670 | +   | +       | +       |
| Putative polysaccharide intercellular adhesin exporter IcaC               | SAKer_02671 | +   | +       | +       |
| Lipase (EC 3.1.1.3)                                                       | SAKer_02673 | +   | +       | +       |

1. truncated.

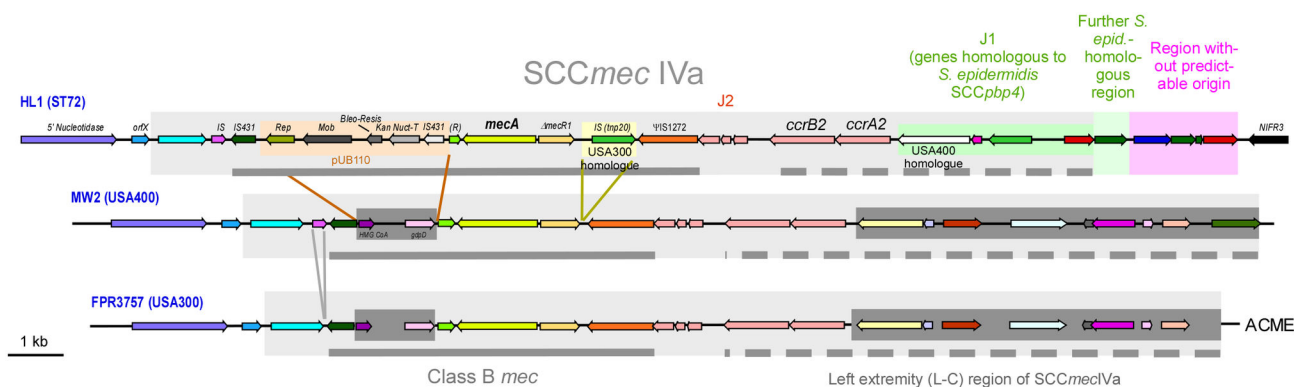

**Figure 3. SCCmec IVa of ST72 HL1.** The HL1 SCCmec IVa element and the adjacent unique downstream region are compared to the SCCmec IVa elements of USA300 and USA400. SCCmec regions are shaded in grey boxes. Colored internal boxes in the case of HL1 show differing regions. Regions present in USA300 and USA400, but absent from HL1 are in dark grey, internal boxes. Solid grey bar, class B *mec* region; dotted grey bar, left extremity (L-C) region. Rep, replication protein; Mob, plasmid mobilization protein; Bleo-Resis, bleomycin resistance protein; Kan Nucl-T, kanamycin nucleotidyltransferase; (R), (R)-specific enoyl-CoA-hydratase; HMGCoA, hydroxymethylglutaryl CoA reductase; ACME, arginine catabolic mobile element (downstream of SCCmec in USA300).

doi: 10.1371/journal.pone.0072803.g003

enterotoxin genes on vSa $\beta$  present in USA400 and HL1 (Fig. 1); and USA400 lacks the chemotaxis-inhibiting protein (CHIPS), gene *chs*, present in HL1 and USA300 on the  $\Phi$ Sa3 prophage (Fig. 2). The gene coding for the staphylococcal complement

inhibitor SCIN is truncated in HL1, but not in USA300 or USA400. The gene *crtN* coding for the biosynthesis of the carotenoid staphyloxanthin immune evasion factor is annotated as truncated in HL1, because it appears to be split in a very

**Table 3.** LPXTG-motif surface proteins.

| Annotation                                                                                                       | Gene number | USA    |        |
|------------------------------------------------------------------------------------------------------------------|-------------|--------|--------|
|                                                                                                                  |             | HL1400 | USA300 |
| 5'-nucleotidase (EC 3.1.3.5)                                                                                     | SAKer_00023 | +      | +      |
| Immunoglobulin G binding protein A precursor                                                                     | SAKer_00085 | +      | +      |
| Hypothetical protein                                                                                             | SAKer_00110 | +      | +      |
| Fibronectin-binding protein SdrC                                                                                 | SAKer_00549 | +      | +      |
| Fibronectin-binding protein SdrD                                                                                 | SAKer_00550 | +      | +      |
| Fibronectin-binding protein SdrE                                                                                 | SAKer_00551 | +      | +      |
| Fibronectin-binding protein CifA                                                                                 | SAKer_00790 | +      | +      |
| Extracellular matrix binding protein / Fibrinogen-binding protein                                                | SAKer_00793 | +      | +      |
| Peptidoglycan endo-beta-N-acetylglucosaminidase (EC 3.2.1.96) / N-acetylmuramoyl-L-alanine amidase (EC 3.5.1.28) | SAKer_00974 | +      | +      |
| Heme uptake protein IsdB                                                                                         | SAKer_01050 | +      | +      |
| Heme uptake heme-iron binding protein IsdA                                                                       | SAKer_01051 | +      | +      |
| Heme uptake cell surface protein IsdC                                                                            | SAKer_01052 | +      | +      |
| Extracellular fibrinogen-binding protein                                                                         | SAKer_01076 | +      | +      |
| Extracellular fibrinogen-binding protein                                                                         | SAKer_01079 | +      | +      |
| Extracellular matrix binding protein                                                                             | SAKer_01373 | +      | +      |
| Elastin-binding protein EbpS                                                                                     | SAKer_01425 | +      | +      |
| Heme uptake receptor for hemoglobin-haptoglobin complexes IsdH                                                   | SAKer_01672 | +      | +      |
| Extracellular matrix binding protein                                                                             | SAKer_01698 | +      | +      |
| Outer membrane protein                                                                                           | SAKer_01913 | +      | +      |
| Extracellular matrix binding protein                                                                             | SAKer_02127 | +      | +      |
| Para-nitrobenzyl esterase (EC 3.1.1. -)                                                                          | SAKer_02435 | +      | +      |
| Beta-N-acetylhexosaminidase (EC 3.2.1.52)                                                                        | SAKer_02484 | +      | +      |
| Fibronectin-binding protein FnbB                                                                                 | SAKer_02488 | +      | +      |
| Fibronectin-binding protein FnbA                                                                                 | SAKer_02489 | +      | +      |
| Clumping factor B                                                                                                | SAKer_02630 | +      | +      |
| Hypothetical protein                                                                                             | SAKer_02647 | +      | +      |
| Serine-rich adhesion for platelets SraP                                                                          | SAKer_02648 | +      | +      |
| Extracellular matrix binding protein                                                                             | SAKer_02655 | +      | +      |

short gene and a larger gene. However, the larger gene likely codes for the functional, previously described CrtN protein [22], while the shorter ORF may be a pseudo-gene. Similarly, HL1 and USA400 have a split coagulase gene, whereas it is not split in USA300. Finally, 28 surface proteins, identified by the sortase substrate LPXTG motif [23], did not show differences in composition between the three analyzed strains (Tab. 3).

PSMs, short, amphipathic,  $\alpha$ -helical peptides have recently been recognized as key determinants of CA-MRSA virulence [24]. They are produced by all *S. aureus* strains, except in naturally occurring Agr-defective mutants, in which no PSMs are detectable. HL1, USA300, and USA400 produce comparably high amounts of PSMs, while HA-MRSA often lack pronounced production of PSMs owing to low activity or mutation of the Agr system [13]. Accordingly, all three strains harbor the genetic loci encoding the PSM $\alpha$  peptides PSM $\alpha$ 1

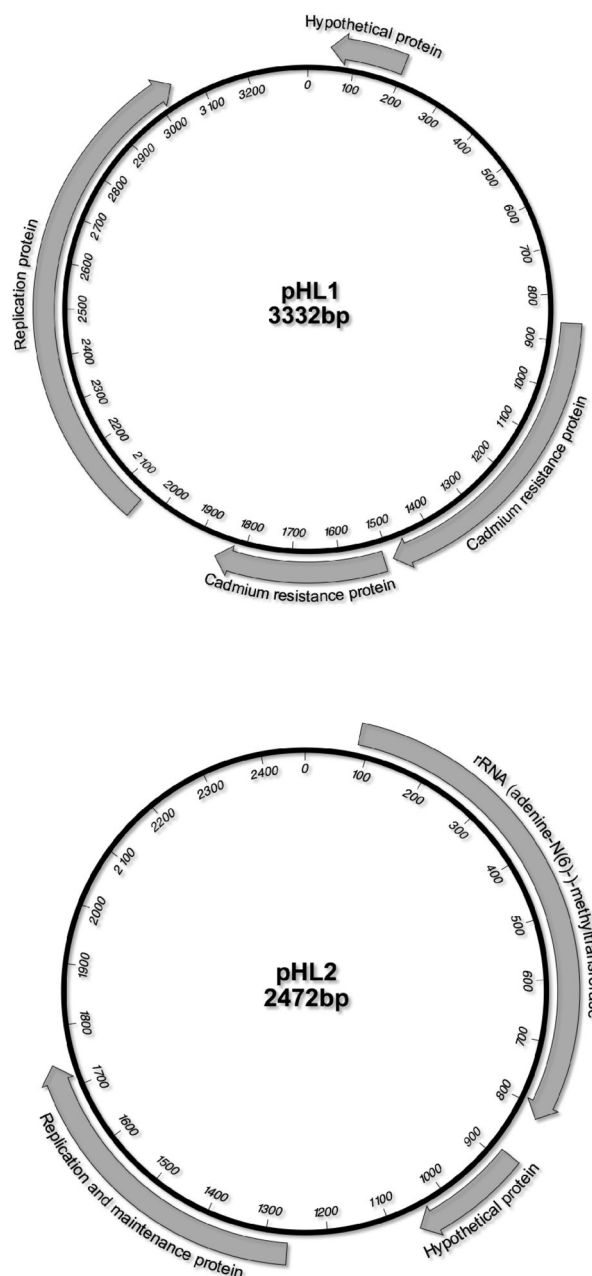**Figure 4.** Plasmids in ST72 HL1.

doi: 10.1371/journal.pone.0072803.g004

through PSM $\alpha$ 4, PSM $\beta$ 1 and PSM $\beta$ 2, and the  $\delta$ -toxin, which is encoded within RNAIII of the Agr quorum-sensing virulence regulator. Notably, the *psma* genes are often not annotated in *S. aureus* genomes, due to their short length, but we annotated them in the HL1 genome and ascertained presence in USA300 and USA400.

Altogether, these findings are in good accordance with the comparable virulence of HL1 and USA400 in the rabbit model of skin infection that we performed previously [13]. The slightly higher virulence of USA300 in that model may be due to ACME-encoded *speG*, which a recent report indicates



promotes virulence during skin infection [7]. Furthermore, they are in line with previous epidemiological studies and infection models performed in the PVL-sensitive rabbit indicating that PVL, as the only major virulence determinant that is absent from HL1 and present in USA300 and USA400, does not have a significant impact on virulence during CA-MRSA skin infection [12,13,25].

### SCCmec

The comparison of the HL1 genome with those of USA300 and USA400 only revealed pronounced differences, encompassing a series of genes, in a very limited number of locations. The strongest difference was seen in and surrounding the SCCmec IVa element (Fig. 3). As previously described by Park et al., the class B *mec* cassette of ST72 SCCmec IVa element contains a *tnp20* IS element and a pUB110 region in addition to the SCCmec IVa element of USA300 and USA400 [26]. The *tnp20* IS element is also found at another location in the genome of USA300, but not USA400. The pUB110 region comprises genes involved in kanamycin and bleomycin resistance, in addition to plasmid replication and recombination enzymes. In the left extremity (L-C) region of HL1 SCCmec, there are four genes with high similarity to genes found in the *S. epidermidis* ATCC12228 genome, indicating that they may have been acquired from *S. epidermidis* – similar to SCCmec IV in general, which is believed to have originated from *S. epidermidis* at an earlier time [27]. One of the genes in this region has a homologue at another location in the USA400 genome, but not in USA300, while the others lack homologues in those strains. The *tnp20* IS element and the USA400 homologue are in vicinity of the *nifR3* gene, encoding a putative nitrogen regulatory protein, in the respective USA300 and USA400 genomes, while the *nifR3* gene is found close to the J1 region of HL1 SCCmec, indicating that recombination between these two genomic sites occurred.

### References

- Lowy FD (1998) *Staphylococcus aureus* infections. *N Engl J Med* 339: 520-532. doi:10.1056/NEJM199808203390806. PubMed: 9709046.
- Lowy FD (2003) Antimicrobial resistance: the example of *Staphylococcus aureus*. *J Clin Invest* 111: 1265-1273. doi:10.1172/JCI18535. PubMed: 12727914.
- Otto M (2012) MRSA virulence and spread. *Cell Microbiol* 14: 1513-1521. doi:10.1111/j.1462-5822.2012.01832.x. PubMed: 22747834.
- DeLeo FR, Otto M, Kreiswirth BN, Chambers HF (2010) Community-associated methicillin-resistant *Staphylococcus aureus*. *Lancet* 375: 1557-1568. doi:10.1016/S0140-6736(09)61999-1. PubMed: 20206987.
- Otto M (2010) Basis of virulence in community-associated methicillin-resistant *Staphylococcus aureus*. *Annu Rev Microbiol* 64: 143-162. doi:10.1146/annurev.micro.112408.134309. PubMed: 20825344.
- Diep BA, Otto M (2008) The role of virulence determinants in community-associated MRSA pathogenesis. *Trends Microbiol* 16: 361-369. doi:10.1016/j.tim.2008.05.002. PubMed: 18585915.
- Thurlow LR, Joshi GS, Clark JR, Spontak JS, Neely CJ et al. (2013) Functional modularity of the arginine catabolic mobile element contributes to the success of USA300 methicillin-resistant *Staphylococcus aureus*. *Cell Host Microbe* 13: 100-107. doi:10.1016/j.chom.2012.11.012. PubMed: 23332159.
- Baba T, Takeuchi F, Kuroda M, Yuzawa H, Aoki K et al. (2002) Genome and virulence determinants of high virulence community-acquired MRSA. *Lancet* 359: 1819-1827. doi:10.1016/S0140-6736(02)08713-5. PubMed: 12044378.
- Diep BA, Gill SR, Chang RF, Phan TH, Chen JH et al. (2006) Complete genome sequence of USA300, an epidemic clone of community-acquired methicillin-resistant *Staphylococcus aureus*. *Lancet* 367: 731-739. doi:10.1016/S0140-6736(06)68231-7. PubMed: 16517273.
- Vandenesch F, Naimi T, Enright MC, Lina G, Nimmo GR et al. (2003) Community-acquired methicillin-resistant *Staphylococcus aureus* carrying Pantón-Valentine leukocidin genes: worldwide emergence. *Emerg Infect Dis* 9: 978-984. doi:10.3201/eid0908.030089. PubMed: 12967497.
- Diep BA, Chan L, Tattevin P, Kajikawa O, Martin TR et al. (2010) Polymorphonuclear leukocytes mediate *Staphylococcus aureus* Pantón-Valentine leukocidin-induced lung inflammation and injury. *Proc Natl Acad Sci U S A* 107: 5587-5592. doi:10.1073/pnas.0912403107. PubMed: 20231457.
- Kobayashi SD, Malachowa N, Whitney AR, Braughton KR, Gardner DJ et al. (2011) Comparative analysis of USA300 virulence determinants in a rabbit model of skin and soft tissue infection. *J Infect Dis* 204: 937-941. doi:10.1093/infdis/jir441. PubMed: 21849291.
- Li M, Cheung GY, Hu J, Wang D, Joo HS et al. (2010) Comparative analysis of virulence and toxin expression of global community-associated methicillin-resistant *Staphylococcus aureus* strains. *J Infect Dis* 202: 1866-1876. doi:10.1086/657419. PubMed: 21050125.
- Li M, Diep BA, Villaruz AE, Braughton KR, Jiang X et al. (2009) Evolution of virulence in epidemic community-associated methicillin-resistant *Staphylococcus aureus*. *Proc Natl Acad Sci U S A* 106: 5883-5888. doi:10.1073/pnas.0900743106. PubMed: 19293374.

### Plasmids

Plasmid pHL1 (3332 bp) contains four ORFs, encoding a plasmid replication protein, a hypothetical protein, and two cadmium resistance proteins (Figure 4). Plasmid pHL2 (2472 bp) encodes a plasmid replication protein, a hypothetical protein, and an rRNA (adenine-N6-) methyltransferase (Figure 4). No virulence factors are encoded on the HL1 plasmids.

### Concluding remarks

Our analysis of a CA-MRSA genome of a previously not analyzed ST advances our understanding of the CA-MRSA pandemic, especially as it represents the first sequenced genome of a PVL-negative CA-MRSA strain. It further strengthens the hypothesis that the success of CA-MRSA as pathogens is multi-factorial rather than dependent on the acquisition of specific, CA-MRSA-characteristic virulence determinants. In particular, we did not find virulence determinants in ST72 with an apparent role of substituting for the absence of PVL, such as, especially, other leukotoxins. While further detailed functional and gene expression analyses will be necessary, these findings suggest that the virulence of ST72 CA-MRSA is mainly dependent, as previously suggested for CA-MRSA in general [5,14], on gene regulatory adaptations enhancing the expression of core genome-encoded virulence determinants.

### Author Contributions

Conceived and designed the experiments: SC SP YY MO. Performed the experiments: YC. Analyzed the data: SP MO. Wrote the manuscript: MO.

15. Lee SS, Kim YJ, Chung DR, Jung KS, Kim JS (2010) Invasive infection caused by a community-associated methicillin-resistant *Staphylococcus aureus* strain not carrying Pantón-Valentine leukocidin in South Korea. *J Clin Microbiol* 48: 311-313. doi:10.1128/JCM.00297-09. PubMed: 19889903.
16. Marmur J (1961) A method for the isolation of deoxyribonucleic acid from microorganisms. *J Mol Biol* 3: 208-218. doi:10.1016/S0022-2836(61)80047-8.
17. DelVecchio VG, Kapatral V, Redkar RJ, Patra G, Mujer C et al. (2002) The genome sequence of the facultative intracellular pathogen *Brucella melitensis*. *Proc Natl Acad Sci U S A* 99: 443-448. doi:10.1073/pnas.221575398. PubMed: 11756688.
18. Kapatral V, Anderson I, Ivanova N, Reznik G, Los T et al. (2002) Genome sequence and analysis of the oral bacterium *Fusobacterium nucleatum* strain ATCC 25586. *J Bacteriol* 184: 2005-2018. doi:10.1128/JB.184.7.2005-2018.2002. PubMed: 11889109.
19. Daly KM, Upton M, Sandiford SK, Draper LA, Wescombe PA et al. (2010) Production of the Bsa lantibiotic by community-acquired *Staphylococcus aureus* strains. *J Bacteriol* 192: 1131-1142. doi:10.1128/JB.01375-09. PubMed: 20023032.
20. Joo HS, Cheung GY, Otto M (2011) Antimicrobial Activity of Community-associated Methicillin-resistant *Staphylococcus aureus* Is Caused by Phenol-soluble Modulins. *J Biol Chem* 286: 8933-8940. doi:10.1074/jbc.M111.221382. PubMed: 21278255.
21. Joshi GS, Spontak JS, Klapper DG, Richardson AR (2011) Arginine catabolic mobile element encoded speG abrogates the unique hypersensitivity of *Staphylococcus aureus* to exogenous polyamines. *Mol Microbiol* 82: 9-20. doi:10.1111/j.1365-2958.2011.07809.x. PubMed: 21902734.
22. Wieland B, Feil C, Gloria-Maercker E, Thumm G, Lechner M et al. (1994) Genetic and biochemical analyses of the biosynthesis of the yellow carotenoid 4,4'-diaponeurosporene of *Staphylococcus aureus*. *J Bacteriol* 176: 7719-7726. PubMed: 8002598.
23. Mazmanian SK, Liu G, Ton-That H, Schneewind O (1999) *Staphylococcus aureus* sortase, an enzyme that anchors surface proteins to the cell wall. *Science* 285: 760-763. doi:10.1126/science.285.5428.760. PubMed: 10427003.
24. Wang R, Braughton KR, Kretschmer D, Bach TH, Queck SY et al. (2007) Identification of novel cytolytic peptides as key virulence determinants for community-associated MRSA. *Nat Med* 13: 1510-1514. doi:10.1038/nm1656. PubMed: 17994102.
25. Bae IG, Tonthat GT, Stryjewski ME, Rude TH, Reilly LF et al. (2009) Presence of genes encoding the panton-valentine leukocidin exotoxin is not the primary determinant of outcome in patients with complicated skin and skin structure infections due to methicillin-resistant *Staphylococcus aureus*: results of a multinational trial. *J Clin Microbiol* 47: 3952-3957. doi:10.1128/JCM.01643-09. PubMed: 19846653.
26. Park C, Shin HH, Kwon EY, Choi SM, Kim SH et al. (2009) Two variants of staphylococcal cassette chromosome mec type IVA in community-associated methicillin-resistant *Staphylococcus aureus* strains in South Korea. *J Med Microbiol* 58: 1314-1321. doi:10.1099/jmm.0.009688-0. PubMed: 19574415.
27. Otto M (2013) Coagulase-negative staphylococci as reservoirs of genes facilitating MRSA infection: Staphylococcal commensal species such as *Staphylococcus epidermidis* are being recognized as important sources of genes promoting MRSA colonization and virulence. *Bioessays* 35: 4-11. doi:10.1002/bies.201200112. PubMed: 23165978.
